# Supplementary material
Source: Springer Nature journal article supplement (https://www.springermedizin.de/resource/supplementary/12957_2013_1927_MOESM1_ESM.pdf/9562626)

## Group A

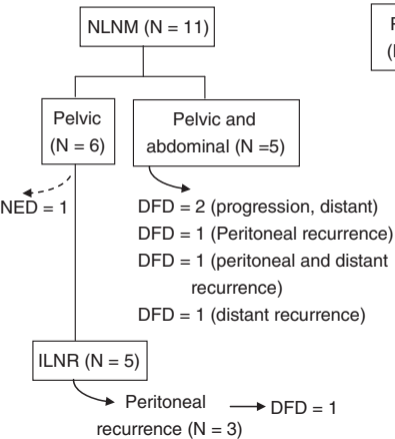

## Group B

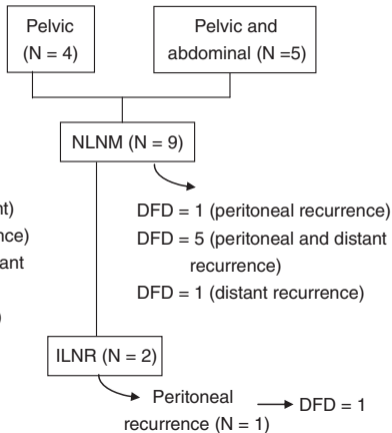

Supplement: MOESM1 [file 9562626]
